# 1 **A chemotactic sensor controls *Salmonella*-host cell interaction**

2 Stefanie Hoffmann<sup>1</sup>, Kathrin Gendera<sup>1</sup>, Christiane Schmidt<sup>1</sup>, Peter Kirchweger<sup>2#</sup>, Axel Imhof<sup>3</sup>, Christian  
3 Bogdan<sup>4</sup>, Yves A. Muller<sup>2</sup>, Michael Hensel<sup>5</sup>, Roman G. Gerlach<sup>1,4\*</sup>

4

5 <sup>1</sup>Project Group 5, Robert Koch Institute, Wernigerode, Germany

6 <sup>2</sup>Division of Biotechnology, Department of Biology, Friedrich-Alexander-Universität Erlangen-Nürnberg  
7 (FAU), Erlangen, Germany

8 <sup>3</sup>BioMedical Center and Center for Integrated Protein Sciences Munich, Ludwig-Maximilians-Universität  
9 München, München, Germany

10 <sup>4</sup>Mikrobiologisches Institut – Klinische Mikrobiologie, Immunologie und Hygiene, Universitätsklinikum  
11 Erlangen and Friedrich-Alexander-Universität Erlangen-Nürnberg, Erlangen, Germany

12 <sup>5</sup>Abteilung Mikrobiologie, Universität Osnabrück, Osnabrück, Germany and CellNanOs - Center for  
13 Cellular Nanoanalytics Osnabrück, Universität Osnabrück, Osnabrück, Germany

14 #present address: Department of Chemical and Structural Biology, Faculty of Chemistry, Weizmann  
15 Institute of Science, Rehovot, Israel

16

17 \*Corresponding author: Roman G. Gerlach

18

19 **Email:** roman.gerlach@uk-erlangen.de

20 **Author Contributions:** R.G.G., S.H., M.H. and Y.A.M. designed research; S.H., K.G., C.S. and P.K.  
21 performed research; R.G.G., S.H. and A.I. analyzed the data; and R.G.G., C.B., M.H. and Y.A.M. wrote  
22 the paper.

23 **Keywords:** *Salmonella*, chemotaxis, adhesion, aspartate

24 **Abstract**

25 Intimate cell contact and subsequent type three secretion system-dependent cell invasion are key steps  
26 in host colonization of *Salmonella*. Adhesion to complex glycostructures at the apical membrane of  
27 polarized cells is mediated by the giant adhesin SiiE. This protein is secreted by a type 1 secretion  
28 system (T1SS) and needs to be retained at the bacterial surface to exert its adhesive function. Here, we  
29 show that SiiE surface expression was linked to the presence of L-aspartate sensed by the *Salmonella*-  
30 specific methyl-accepting chemotaxis protein CheM. Bacteria lacking CheM were attenuated for  
31 invasion of polarized cells, whereas increased invasion was seen with *Salmonella* exposed to the non-  
32 metabolizable aspartate analog  $\alpha$ -methyl-D, L-aspartate (MeAsp). While components of the chemotaxis  
33 phosphorelay or functional flagella were dispensable for the increased invasion, CheM directly  
34 interacted with proteins associated with the SiiE T1SS arguing for a novel non-canonical signaling  
35 mechanism. As a result, CheM attractant signaling caused a shift from secreted to surface-retained and  
36 adhesion-competent SiiE. Thus, CheM controls the virulence function of SiiE in a precise spatio-  
37 temporal fashion depending on the host micro-milieu.

## 38 INTRODUCTION

39 Many pathogenic bacteria strongly rely on their ability to get into close contact to eukaryotic host cell  
40 surfaces. By means of different adhesins, they are able to colonize mucosal surfaces or invade cells  
41 and establish their niches in host organisms. *Salmonella enterica* subsp. *enterica* serovar Typhimurium  
42 (STM) is a pathogen that is capable to infect diverse hosts and usually causes a self-limiting  
43 gastrointestinal infection. STM can invade non-phagocytic cells by deploying a type III secretion system  
44 (T3SS) that is encoded by the *Salmonella* pathogenicity island 1 (SPI-1) (1). An intimate contact  
45 between the pathogen and the host cell is essential for the subsequent translocation of effector  
46 molecules by the SPI-1-dependent T3SS (T3SS-1). This triggers an inflammatory host immune  
47 response, which does not only weaken the enterocyte barrier function, but also helps STM to compete  
48 with the intestinal microbiota (2). While the T3SS-1 itself can already mediate adhesion (3), additional  
49 adhesive structures such as Fim fimbriae (4) or the giant non-fimbrial adhesin SiiE (5) are also critical  
50 for bacterial attachment, depending on the type of host cell. Transcriptional co-regulation of SPI-1 with  
51 the SiiE-encoding *Salmonella* pathogenicity island 4 (SPI-4) is the basis of this functional cooperation  
52 (5, 6).

53 In line with previous findings on other polarized cells (7), it was recently shown that apical invasion of  
54 intestinal epithelial cells requires SiiE (8). SiiE likely functions as a lectin recognizing glycostructures  
55 with terminal *N*-acetylglucosamine (GlcNAc) and/or  $\alpha$  2,3-linked sialic acid residues (9). The unique  
56 structural features of the ~175 nm long 600 kDa adhesin SiiE allow *Salmonella* to overcome the anti-  
57 adhesive barrier function of the transmembrane, epithelial mucin MUC1, the extracellular domain of  
58 which is heavily decorated with O-linked glycans terminating in negatively charged sialic acids (8). SiiE  
59 comprises 53 bacterial immunoglobulin-like (BIg) domains that show distinct  $\text{Ca}^{2+}$  binding motifs crucial  
60 for its rigid tertiary structure (10, 11). SiiE is the only known substrate of the SPI-4-encoded T1SS and  
61 contains a complex C-terminal secretion signal (7). Based on similarity to other T1SS, e.g., the *E. coli*  
62 hemolysin system (12), secretion is likely achieved in a single step without a periplasmic intermediate.  
63 Considering these structural features, SiiE is thought to be permanently secreted into the extracellular  
64 space. A recent study showed that secreted SiiE suppressed the humoral immune response against  
65 *Salmonella* by reducing the number of IgG-secreting plasma cells in the bone marrow. Mechanistically,  
66 an N-terminal region of SiiE with high similarity to laminin  $\beta$ 1 bound to  $\beta$ 1 integrin (CD29) on IgG<sup>+</sup> plasma  
67 cells, thereby preventing their interaction with laminin  $\beta$ 1<sup>+</sup>CXCL12<sup>+</sup> stromal cells which otherwise form

68 a survival niche for plasma cells in the bone marrow (13). However, in line with its function as an adhesin,  
69 the protein was also found temporally retained on the surface of *Salmonella* (7, 8, 14). Nonetheless, it  
70 is still unclear how the surface expression of SiiE and hence the switch between its function as adhesin  
71 vs. immunosuppressant is regulated.

72 Here, we show that the presence of aspartate (Asp) promotes the surface expression of SiiE and the  
73 adhesion of *Salmonella*, which turned out to be dependent on the *Salmonella*-specific methyl-accepting  
74 chemotaxis protein (MCP) CheM, an ortholog of *E. coli* Tar/MCP-II. Using mass spectrometry, CheM  
75 and other MCPs were identified as interaction partners of the SPI-4 encoded SiiA and SiiB. SiiAB are  
76 associated with the T1SS and form an inner membrane proton (H<sup>+</sup>) channel with similarities to the  
77 ExbB/TolQ and MotAB family (15, 16). Using a set of consecutive MCP deletion mutants, we found that  
78 invasion of polarized cells by STM was attenuated upon deletion of *cheM*. Binding of Asp to CheM  
79 usually triggers bacterial chemotaxis towards the attractant gradient (17). We discovered that the  
80 addition of a non-metabolizable aspartate analog,  $\alpha$ -methyl-D,L-aspartate (MeAsp), elevated host cell  
81 invasion by STM. Using mutants lacking downstream components of the chemotaxis phosphorelay or  
82 functional flagella, we observed that neither classical chemotaxis signaling nor bacterial motility  
83 contributed to the increased invasion. Instead, attractant-stimulation of CheM caused a shift from  
84 secreted to surface-retained and adhesion-competent SiiE. We therefore suggest that aspartate acts as  
85 microenvironmental cue that elicits the SPI-4-dependent adhesion to and invasion of polarized epithelial  
86 cells by *Salmonella* through a novel, non-canonical signaling pathway of the MCP CheM via SiiAB to  
87 the SPI-4 T1SS and SiiE.

## 88 RESULTS

### 89 SiiAB interact with CheM

90 Our previous results suggested that SiiE-mediated adhesion depends on the function of the SPI-4 T1SS-  
91 associated SiiAB proton channel (15). We set out to identify protein interaction partners as potential  
92 regulators of SiiA and/ or SiiB. Epitope-tagged SiiA or SiiB was expressed from low copy-number  
93 plasmids and used as bait proteins to purify complexes after crosslinking. Composition of complexes  
94 was determined by liquid chromatography coupled to mass spectrometry (LC-MS/MS). As expected,  
95 both bait proteins were under the top five identified proteins (Fig 1A). Moreover, our data confirmed the  
96 previously found (15) interaction between SiiA and SiiB, since both proteins were identified as prey while  
97 using the other as bait. Interestingly, a set of MCPs (Aer, Trg, McpB, McpC and CheM) was enriched in  
98 the SiiA complex while in the SiiB complex the MCP CheM was identified. MCPs act as sensors  
99 controlling flagellar movement towards attractants and away from repellants (18). In the following, we  
100 focused on CheM because the protein was previously implicated to have a role in *Salmonella* invasion  
101 of HeLa cells (19, 20) and appears to interact with both SiiA and SiiB. CheM is a *Salmonella*-specific  
102 MCP and an ortholog of *E. coli* Tar, but shares only 79% of sequence identity. Like known for Tar, the  
103 amino acid L-aspartate functions as an attractant stimulus for CheM while  $\text{Co}^{2+}$  and  $\text{Ni}^{2+}$  ions act as  
104 repellants (17, 21). However, in contrast to Tar, CheM does not respond to maltose (22).

105 To confirm the interactions between SiiAB and CheM identified by MS, we performed a bacterial two-  
106 hybrid (B2H) assay which is based on the functional complementation of *Bordetella pertussis* adenylate  
107 cyclase (CyaA) from T25 and T18 fragments (23). The T25 fragment was fused to SiiA, SiiB, SiiD, SiiF  
108 or to a non-functional SiiA<sup>D13N</sup> mutant (15), while the T18 fragment was fused to CheM. Blue colonies of  
109 the *cyaA*-deficient *E. coli* reporter strain BTH101 (24) indicated functional CyaA protein  
110 complementation and thus protein-protein interaction. We observed a strong interaction (dark blue  
111 colonies) between CheM-T18 and T25 fusions of SiiA and SiiA-D13N (Fig 1B). Moreover, high reporter  
112 activity was also observed when testing for the known dimerization of Tar/CheM (18) with co-expression  
113 of CheM-T18 and T25-CheM or CheM-T25 (Fig 1B). Lighter blue colonies were observed for the co-  
114 expression of CheM-T18 and SiiB-T25 or T25-SiiD showing  $\beta$ -galactosidase activity comparable to that  
115 of the positive control (Fig 1B). Furthermore, we performed co-immunoprecipitation (co-IP) using epitope  
116 tagged proteins. When CheM-3×Flag was used as bait, both SiiA and SiiB were identified as prey  
117 proteins. Vice versa, using SiiB-3×Flag as bait, SiiA and epitope-tagged CheM-HA were detected as

118 interaction partners (Fig 1C). Thus, using three independent approaches, we established that CheM  
119 interacts with both SiiA and SiiB while confirming the known SiiAB complex (15) and CheM dimerization  
120 (18).

### 121 **Role of MCPs for invasion of polarized MDCK**

122 Bacterial motility is required for efficient invasion of *Salmonella* into HeLa (25) and polarized Caco-2  
123 cells (26). In a previously published study, we further assessed the impact of chemotaxis on invasion  
124 efficiency of non-polarized HeLa cells using sequential deletion of up to seven MCP genes (19). We  
125 found that loss of CheY or CheM led to an increase of *Salmonella* invasion (19) as observed earlier for  
126 smooth swimming mutants (20, 27). Because SPI-4 function was shown to play a role for adhesion to  
127 polarized cells only (5, 7, 8), we aimed to investigate the role of individual MCPs on *Salmonella* invasion  
128 of polarized Madin-Carby Canine Kidney (MDCK) cells. Host cells were infected with STM wild-type  
129 (WT), a smooth swimming *cheY* mutant,  $\Delta$ *siiF* (non-functional SPI-4 T1SS) and MCP mutant strains as  
130 described (19), followed by quantification of intracellular bacteria and subsequent normalization to STM  
131 WT. Interestingly, all MCP mutants missing the *cheM* gene exhibited reduced invasion in polarized  
132 MDCK cells. In contrast, elevated invasion rates were observed for the same *cheM*-lacking mutants  
133 when using non-polarized HeLa cells as described before (19) (Fig 2). While a smooth swimming  $\Delta$ *cheY*  
134 strain showed a 2-fold increased invasion rate in HeLa, the mutant was significantly attenuated in MDCK  
135 arguing for a role of chemotaxis for efficient invasion of polarized cells. In line with the known importance  
136 of SPI-4 for the adhesion to and invasion of MDCK cells (7), very few intracellular bacteria harboring an  
137 E627Q mutation within the Walker B motif of the SiiF ABC protein were detected (Fig 2). Thus, the type  
138 of infection model (non-polarized vs. polarized cells) determine the impact of CheM function on STM  
139 invasion which mirrors the differences seen for SPI-4 function (7).

### 140 **CheM attractant binding fosters *Salmonella* invasion of polarized cells**

141 To characterize a possible functional link of CheM to the SPI-4-encoded T1SS, we constructed two low-  
142 copy-number plasmids that encode *Salmonella cheM* or, as a control, *E. coli tar*, each modified with a  
143 C-terminal 3×Flag-tag under control of the STM *cheM* promoter ( $P_{cheM}$ ). After introducing the plasmids  
144 in a mutant lacking all seven MCP genes ( $\Delta$ 7 MCP) (19), Western blot demonstrated similar expression  
145 of both proteins with the cytosolic protein DnaK as loading control (Fig 3A). Next,  $\Delta$ 7 MCP was  
146 transformed with the empty vector control (pWSK29) and plasmids encoding for CheM (pCheM) or Tar  
147 (pTar) without epitope tag and these strains were further functionally characterized in swarming assays

148 using soft agar plates. While the strain harboring pWSK29 did not swarm, pCheM and pTar conferred  
149 swarming ability to the mutant. However, compared to STM WT (> 5 cm, not shown), both plasmid-  
150 complemented  $\Delta 7$  MCP showed a reduced swarming distance with ~4 cm (pCheM) and ~1 cm (pTar),  
151 respectively (Fig 3B). To test more specifically the ability to respond to CheM attractants, we performed  
152 a capillary assay as described by Adler (28) using MeAsp (29) (Fig 3C, left panel). Quantifying the  
153 bacteria within the fixed-volume capillary revealed significantly more cells in case of the pCheM-  
154 complemented strain, compared not only to the vector control, but also compared to WT (Fig 3C, right  
155 panel).

156 We hypothesized that not the CheM protein itself, but rather CheM signaling elicited by the binding of  
157 CheM ligands (i.e. attractants) may have an impact on SPI-4 function and subsequently on invasion of  
158 polarized epithelial cells. Usually, attractant binding inactivates autokinase activity of MCP-coupled  
159 CheA, thus reducing phosphoryl transfer to the response regulators CheY and CheB. While low CheY~P  
160 results in counter-clockwise (CCW) flagellar rotation and straight swimming, receptor methylation is high  
161 due to low CheB~P methylesterase activity (18). Therefore, STM WT and the  $\Delta 7$  MCP mutant containing  
162 either the vector control, pCheM or pTar were tested for invasion of MDCK without attractant, in the  
163 presence of 10 mM MeAsp or, as a control, 10 mM of the non-metabolizable Tsr attractant  
164  $\alpha$ -aminoisobutyrate (AiBu) (30, 31). While AiBu had no or, in case of STM WT, even a detrimental effect  
165 on invasion, addition of MeAsp elevated invasion capability of WT and pCheM-complemented  $\Delta 7$  MCP  
166 (Fig 3D). The pCheM vector partially complemented the invasion defect of the  $\Delta 7$  MCP mutant in the  
167 absence of attractant or with addition of AiBu, while the strains carrying pTar or the vector control were  
168 attenuated for invasion regardless of attractant supplementation (Fig 3D).

169 To verify our findings obtained with MDCK cells, we employed HT29-MTX cells (8, 32) as an alternative  
170 infection model. In contrast to non-polarized 1-day cultures (Fig S1A, upper panel), polarized  
171 monolayers with significant amounts of mucus were formed after 21 days of culture (Fig S1A, lower  
172 panel). Similar to HeLa cells (7), *Salmonella* invasion of non-polarized HT29-MTX cells required T3SS-1  
173 but was independent of SPI-4 (Fig S1B). Invasion of polarized HT29-MTX cells, however, was strongly  
174 dependent on an intact SPI-4 locus (Fig 3E) as observed before (8). In close accordance with the MDCK  
175 data, elevated invasion of HT29-MTX cells was observed for WT and  $\Delta 7$  MCP [pCheM] in the presence  
176 of MeAsp (Fig 3E). However, pCheM was able to complement the  $\Delta 7$  MCP mutant to the level of WT  
177 STM without attractant or with 10 mM AiBu. In contrast, low invasion rates were observed for cells  
178 without CheM (Fig 3E).

179 Taken together, using two infection models based on polarized cells, we observed a stimulating effect  
180 of the CheM ligand MeAsp on *Salmonella* invasion. The phenotype was specifically dependent on the  
181 presence of CheM. No increase in invasion was seen in strains only expressing *E. coli* Tar or with  
182 addition of the Tsr ligand AiBu.

### 183 **Augmented invasion after CheM stimulation is independent of motility and chemotaxis**

184 Bacterial motility and chemotaxis towards energy sources was shown to be required for *Salmonella*  
185 virulence *in vivo* (33-35). Because our data also suggest a promoting effect of chemotaxis for invasion  
186 of polarized cells, we set out to characterize the role of motility and the chemotaxis phosphorelay  
187 pathway for the observed phenotype in more detail. We generated a non-motile mutant lacking the  
188 flagella-specific ATPase *flil* and employed, besides the *cheY*-deficient strain, a mutant lacking the  
189 histidine autokinase CheA. Together with MCPs and the coupling protein CheW, CheA dimers form a  
190 ternary complex that is the minimum requirement for chemosensing (18, 36). The *cheA* and *cheY*  
191 mutations were further combined with the  $\Delta 7$  MCP mutant. These mutant strains were all attenuated for  
192 invasion of MDCK. Interestingly, the non-motile  $\Delta flil$  and the two 8-fold mutants ( $\Delta 7$  MCP plus  $\Delta cheA$   
193 and  $\Delta 7$  MCP plus  $\Delta cheY$ ) exhibited an even stronger phenotype with almost no invasion detectable (Fig  
194 4A). While significantly more intracellular WT STM bacteria were found when grown in the presence of  
195 MeAsp, the mutants responded neither to this attractant nor to AiBu (Fig 4A).

196 Motile bacteria exhibit an invasion advantage due to near surface swimming and thus higher probability  
197 to encounter a host cell (25). To compensate for the lack of motility, we used centrifugation to bring  
198 bacteria into close proximity to the host cells, which allows investigating bacterial invasion following  
199 adhesion despite the absence of bacterial motility. Under these conditions, the  $\Delta flil$  mutant behaved like  
200 WT with significantly increased invasion in the presence of MeAsp (Fig 4B). The invasion capability of  
201 the  $\Delta 7$  MCP mutant was not altered by centrifugation. While  $\Delta cheA$  and  $\Delta cheY$  mutants behaved similar  
202 to WT bacteria without attractant or with AiBu, they showed vastly increased invasion rates when MeAsp  
203 was added (Fig 4B). In contrast, *Salmonella* with a *cheA* or *cheY* mutation and simultaneous deletion of  
204 all MCPs ( $\Delta cheA \Delta 7$  MCP or  $\Delta cheY \Delta 7$  MCP) lost the responsiveness to MeAsp and the ability to invade  
205 host cells. Thus, MeAsp fosters *Salmonella* invasion in a CheM-dependent manner, but this process is  
206 independent of bacterial motility and the chemotaxis phosphorelay pathway.

### 207 **CheM signaling shifts SiiE from release to retention**

208 The experiments described above excluded a motility-related effect to be responsible for elevated



209 *Salmonella* invasion after MeAsp stimulation. Instead, the pronounced phenotype in conjunction with  
210 polarized cells and the identification of CheM as a SiiAB interaction partner argues for CheM as a  
211 regulator of SPI-4 dependent adhesion. Previous studies suggested that SPI-4 adhesion capability is  
212 determined by the amount and/ or binding strength of surface-localized SiiE (7, 14). Therefore,  
213 mechanisms regulating SiiE surface expression might account for SPI-4 dependent adhesion.  
214 To test whether attractant binding to CheM affects localization of SiiE, we quantified the amounts of  
215 surface-retained and secreted SiiE adhesin after 3.5 h of growth (late logarithmic phase) with or without  
216 addition of MeAsp. Bacteria-associated SiiE was quantified in a dot blot assay using a SiiE-specific  
217 antibody and normalization to the LPS signal. Upon addition of MeAsp, elevated amounts of retained  
218 SiiE were detected for WT STM and the  $\Delta 7$  MCP mutant carrying pCheM (Fig 5A). In contrast, no  
219 upregulation of surface-localized SiiE in response to MeAsp was observed for the  $\Delta 7$  MCP mutant  
220 harboring the empty vector or for the  $\Delta siiE$  mutant which served as negative control (Fig 5A).  
221 Quantification of secreted SiiE using a specific ELISA (6) revealed an inhibitory effect of CheM attractant  
222 binding reciprocal to SiiE surface localization. MeAsp inhibited SiiE secretion of WT and  $\Delta 7$  MCP  
223 [pCheM] to the level of the  $\Delta siiE$  control. Interestingly, compared to WT STM, almost 2-fold more SiiE  
224 was secreted from the  $\Delta 7$  MCP strain harboring the empty vector control (Fig 5B).  
225 Our findings support a model where the interplay of CheM with the SPI-4 components SiiAB regulates  
226 SiiE localization. Attractant binding by CheM resulted in more surface-localized SiiE. To test whether  
227 indeed surface-retained SiiE can function as an adhesin, we combined competitive index experiments  
228 with a screen for ligand expression using immunomagnetic particles (SIMPLE) (37) (Fig 6A). The test  
229 and reference strains harboring different antibiotic resistance cassettes were mixed equally and an  
230 aliquot was plated on appropriate selective media to verify the proportion of the two strains.  
231 Subsequently,  $\alpha$ -SiiE antibodies and magnetic protein A beads were added to the mixture. SiiE-positive  
232 bacteria were enriched through magnetic separation of beads coated with antibodies that have bound  
233 their antigen. Finally, the proportion of test and reference strain was determined through parallel plating  
234 (Fig 6A). Using STM WT as test strain and  $\Delta siiE$  as reference, we achieved ~8-fold enrichment using  
235 this assay. As expected, there was no effect of MeAsp on enrichment of STM WT over  $\Delta siiE$  (Fig 6B).  
236 When the  $\Delta 7$  MCP strain was used as reference, WT STM was ~3-fold enriched in the presence of  
237 MeAsp, while no enrichment was seen without attractant (Fig 6B). These results demonstrate that  
238 addition of MeAsp enhanced the localization of SiiE on the surface of *Salmonella* in a MCP-dependent  
239 manner.

## 240 DISCUSSION

241 In the present study, we identified the MCP CheM as a novel SiiAB interaction partner and the binding  
242 of attractants to CheM as a positive regulator of SPI-4 dependent adhesion. We found that straight  
243 swimming *cheA* or *cheY* mutants, which resemble an attractant-bound “always off” state of the MCPs  
244 and are incapable of phosphoryl transfer, were attenuated for invasion in polarized cells. In contrast,  
245 straight swimming *Salmonella* showed a higher probability to invade other cell types (19, 25). Recently,  
246 the *Salmonella* MCP McpC was shown to promote a straight swimming phenotype that was dependent  
247 on the SPI-1 transcription factor HilD (38). When we bypassed the impact of motility and chemotaxis on  
248 bacteria-host cell interaction by centrifugation, addition of the CheM attractant MeAsp was still able to  
249 enhance invasion of polarized cells. This was particularly remarkable for the non-motile  $\Delta fliI$  strain, which  
250 by itself rules out any involvement of the “classical” chemotaxis-motility pathway. In the absence of  
251 MeAsp, centrifugation of  $\Delta cheA$  and  $\Delta cheY$  mutants led to invasion rates comparable to WT. Strikingly,  
252 in the presence of the CheM attractant, these strains were hyperinvasive (~20-25-fold of WT). In  
253 contrast, invasion capability was completely abolished with additional deletion of all 7 MCP genes.  
254 These observations cannot be explained with the chemotaxis phosphorelay signaling (18). Therefore,  
255 we propose a novel, non-canonical signal transduction from the MCP to SPI-4 encoded proteins  
256 resulting in increased adhesion and subsequent bacterial invasion. Links between chemotaxis and  
257 bacterial virulence functions are not unprecedented. In *Pseudomonas aeruginosa*, the putative MCP  
258 encoded by *PA2573* regulates genes involved in virulence and antibiotic resistance and the soluble  
259 chemoreceptor McpB was shown to be important for virulence in several infection models (39, 40). In  
260 *Cronobacter sakazakii*, a plasmid-encoded MCP was reported to have an impact on adhesion, invasion,  
261 motility and biofilm formation (41). The MCPs Tcpl and AcfB of *Vibrio cholerae* were shown to be  
262 important for infant mouse colonization (42). For plant pathogenic bacteria such as *Agrobacterium*  
263 *tumefaciens* or *Xanthomonas oryzae* pv. *oryzae*, many chemoattractants can also act as virulence  
264 inducers (43, 44). However, in all these examples chemotaxis signaling is mechanistically linked to  
265 virulence through transfer of phosphoryl groups to alternative response regulators resulting in a  
266 virulence-specific transcriptional response (36).

267 The transduction of the CheM attractant signal is presumably based on the identified interaction of the  
268 MCP with the SPI-4 T1SS-associated SiiAB proton channel. It is tempting to postulate a regulation of  
269 SiiAB proton flux through direct interaction with attractant-bound CheM (Fig 7). The peptidoglycan (PG)

270 binding domain of MotB was shown to function as a plug sealing the proton channel. Upon association  
271 with the flagellar motor complex, the MotB domain is shifted through PG binding and thereby enables  
272 proton flux and energy conversion of the system (45). Similarly, the SiiA PG binding domain (16) could  
273 be displaced from the SiiAB proton channel through interaction with attractant-bound CheM. In  
274 orthologous *E. coli* Tar dimers, Asp binding induces a piston-like movement of one alpha helix within  
275 the sensory domain. This movement is amplified in the cytosolic HAMP domains and finally transmitted  
276 to the hairpin tip bundle controlling CheA autokinase activity (18). In our model, the structural changes  
277 within the CheM ligand binding domain, and perhaps other portions of the molecule, would change the  
278 molecular interface between CheM and the SiiAB channel, thus enabling PG binding of SiiA and proton  
279 flux. The energy harvested from the transmembrane H<sup>+</sup> gradient would then be transferred to the SPI-4  
280 encoded T1SS by means of an energy-rich conformation resulting in retention of the SiiE molecule (Fig  
281 7). Such energy transfer has been described for the SiiAB homologs ExbBD and TolQR inducing  
282 conformational changes in TonB and TolA, respectively (46, 47). Interestingly, *in vitro* studies with the  
283 isolated periplasmic domain of SiiA showed a pH-dependency of PG binding activity. SiiA PG-binding  
284 was observed at pH 5.8-6.2, but not between pH 6.7 and pH 8.0 (16). Here, slightly acidic pH as found  
285 in some parts of the gut could serve as another environmental signal to regulate the adhesion capacity  
286 of SPI-4. Alternatively, the observed pH-dependent PG binding could function as a proxy to ensure  
287 sufficient energization by detecting periplasmic protons contributing to the proton motif force (PMF).  
288 According to our model (Fig 7), *Salmonella* utilizes Asp as an environmental cue to control SiiE surface  
289 expression. Aspartate and other free amino acids are generated from oligopeptides originating from food  
290 through the activity of peptidases at the apical side of polarized enterocytes (48). The bulk of this amino  
291 acid liberation, and subsequent absorption, takes place in the proximal jejunum and is usually complete  
292 at the terminal ileum (48, 49). Although there is extensive catabolism of enteral Asp by enterocytes (50)  
293 and gut bacteria (51), the microbiota also releases free Asp through peptide degradation (52). Recently,  
294 Asp was found to contribute to initial murine gut colonization of STM by enabling hydrogen/fumarate-  
295 dependent anaerobic respiration. Aspartate is taken up in exchange of succinate by the high-affinity  
296 antiporter DcuABC and converted to the alternative electron acceptor fumarate (53). Therefore, the  
297 availability of Asp within the small intestine not only enables bacterial expansion in competition to the  
298 intestinal microbiota, but also contributes, amongst other environmental stimuli, to precise spatio-  
299 temporal control of bacterial adhesion to polarized epithelial cells.

300 In summary, we found that the MCP CheM interacted with the SPI-4 encoded SiiAB proton channel.

301 Asp was identified as an attractant of CheM that elicited a change in the localization of the giant SPI-4-  
302 encoded adhesin SiiE of *Salmonella*: in the absence of Asp, SiiE was primarily secreted, whereas in the  
303 presence of Asp, SiiE was retained on the bacterial surface. Surface-bound, but not secreted SiiE  
304 functions as an adhesin. Thus, the CheM attractant L-aspartate acts as positive regulator of SPI-4-  
305 dependent adhesion to polarized cells. Although CheM directly interacts with the SPI-4 encoded SiiAB  
306 proton channel, the exact molecular mechanisms of signal transductions and adhesin retention remain  
307 to be characterized.

## 308 MATERIALS AND METHODS

### 309 Bacterial strains and plasmids

310 All strains used are listed in Table S1. Bacteria were routinely grown in LB media supplemented with  
311 50 µg/mL carbenicillin (Cb) (Carl Roth, Mannheim, Germany), 25 µg/mL kanamycin (Km) (Carl Roth),  
312 10 µg/mL chloramphenicol (Cm) (Carl Roth), 50 ng/mL anhydrotetracycline (AHT) (# 37919 Sigma-  
313 Aldrich, Schnelldorf, Germany), 10 mM  $\alpha$ -aminoisobutyrate (AiBu) (#850993 Sigma-Aldrich) or 10 mM  
314  $\alpha$ -methyl-D, L-aspartate (MeAsp) (#M6001 Sigma-Aldrich), if required. For details on the construction of  
315 mutant strains and plasmids, the reader is referred to the supplementary information. Tables S2 and S3  
316 give an overview of all the plasmids and primers used in this study, respectively.

### 317 Protein-protein interaction assays

318 Bacterial two hybrid (B2H) assays were essentially carried out as described before (15). Briefly, *E. coli*  
319 reporter strain BTH101 was co-transformed with plasmids encoding for protein fusions with the T18 and  
320 T25 fragments of *Bordetella pertussis* CyaA. Transformants were spread on LB plates containing  
321 25 µg/mL kanamycin, 100 µg/mL carbenicillin, 100 µM IPTG (Thermo Scientific, St. Leon-Rot,  
322 Germany) and 40 µg/mL X-Gal (5-bromo-4-chloro-3-indolyl- $\beta$ -D-galactopyranoside; Thermo Scientific).  
323 Plates were incubated at room temperature for 48-72 h, and blue colonies indicated protein interaction  
324 resulting in functional CyaA-complementation.

325 For co-immunoprecipitation (co-IP), STM were either transformed with pWRG868 (CheM-3 $\times$ Flag) or co-  
326 transformed with pWRG903 (CheM-HA) and pWRG905 ( $P_{tet}::siiAB$ -3 $\times$ Flag). O/N cultures were re-  
327 inoculated 1:31 into 500 mL fresh medium and grown with aeration for 3.5 h. The expression of SiiAB-  
328 3 $\times$ Flag was induced for 2 h with AHT. Cells were pelleted (8,000  $\times$  g, 10 min, room temperature (RT)),  
329 re-suspended in 250 mL of pre-warmed MEM medium (Capricorn Scientific, Ebsdorfergrund, Germany)  
330 and allowed to grow for additional 30 min. Proteins were crosslinked with addition of 0.5% (w/v)  
331 paraformaldehyde (#43368 Alfa Aesar, Heysham, UK). After 15 min, the reaction was quenched with  
332 0.125 M glycine. Cells were washed thrice with ice-cold MEM medium and then stored at -20 C. Pellets  
333 were re-suspended in 10 mL PBS supplemented with 1% *n*-dodecyl  $\beta$ -D-maltoside (# A0819,  
334 AppliChem, Darmstadt, Germany), 1 $\times$  EDTA-free Halt protease inhibitor cocktail (#87785, Thermo  
335 Fisher Scientific, Karlsruhe, Germany), 0.5 mM MgSO<sub>4</sub> and 5 µL TURBO DNase (Ambion).  
336 Subsequently, cells were lysed through a French pressure cell (EmulsiFlex-C3, Avestin, Mannheim,

337 Germany) and debris was removed by low speed centrifugation (11,000 × g, 20 min, 4°C). The protein  
338 extract, containing either SiiB-3×Flag or CheM-3×Flag, was further cleared by additional centrifugation  
339 (20,000 × g, 15 min, 4°C). The protein concentration was measured by BCA assay (#23225, Thermo  
340 Fisher) and similar protein amounts were used for co-IP of all samples. Immunoprecipitation of 3×Flag-  
341 tagged proteins was performed using α-FLAG M2 affinity gel (Sigma-Aldrich) following the  
342 manufacturer's recommendations. Therefore, 100 µL of the gel suspension (50 µL of packed gel  
343 volume) were washed 3× with 1 mL of PBS and subsequently added to each sample. Protein binding  
344 was allowed over night at 4°C. After three further washing steps, bound proteins were eluted from the  
345 beads with addition of 50 µL reducing sample buffer (Carl Roth) and heating for 15 min to 98°C.

#### 346 **Western blot**

347 Aliquots of protein samples were mixed with reducing sample buffer (Carl Roth) to a final concentration  
348 of 1×. After heating to 98°C for 15 min, 10 µL of each sample was analyzed by SDS-PAGE  
349 electrophoresis (ProSieve, Lonza, Cologne, Germany) and subsequent Western blot (Bio-Rad, Munich,  
350 Germany) on a polyvinylidene difluoride membrane (Thermo Fisher). Membranes were probed with  
351 antibodies against DnaK (clone 8E2/2, Enzo Life Science, Lörrach, Germany), SiiA, SiiB (15), HA (clone  
352 3F10, Roche, Mannheim, Germany) or Flag (M2, Sigma-Aldrich) and appropriate horseradish-coupled  
353 secondary antibodies (Dianova, Hamburg, Germany).

#### 354 **Mass spectrometry**

355 STM was co-transformed with pWRG416 ( $P_{tet}::hiiA$ , resulting in mild SPI-1/4 overexpression) plus  
356 pWRG461 (*siiA*-3×Flag) or with pWRG416 plus pWRG462 (*siiAB*-3×Flag). Protein complexes were  
357 purified with α-FLAG M2 affinity gel (Sigma-Aldrich) as described for co-IP. After washing, bead-bound  
358 proteins were eluted twice with 450 µL of 0.1 M glycine pH3.5 and 180 µL of 0.5 M Tris-HCl pH7.4,  
359 1.5 M NaCl was added for neutralization. To precipitate the proteins, trichloroacetic acid was added to a  
360 final concentration of 10% and the samples were incubated O/N at 4°C. After centrifugation (20,000 × g,  
361 45 min, 4°C), the pellets were washed twice with ice-cold acetone. The air-dried pellet was finally  
362 suspended in 100 µL fresh 50 mM  $\text{NH}_4\text{HCO}_3$ , pH7.8. The samples were subjected to tryptic digestion  
363 and the resulting peptide mixtures were analyzed by nano-ESI-LC-MS/MS (Thermo Scientific LTQ  
364 Orbitrap). Proteins were identified using Mascot (Matrix Science, London, UK) based on a custom  
365 proteome file of *S. Typhimurium* strain ATCC 14028s. Spectral counts were extracted using Scaffold  
366 Viewer (Proteome Software, Portland, OR, USA) and compared to controls (similar treated

367 S. Typhimurium WT without 3×Flag tagged proteins) with the 'R' (54) package 'apmsWAPP' (55)  
368 applying upper quartile normalization and interquartile range filtering. Data is summarized in Table S4.

### 369 **Cell culture and infection**

370 HT29-MTX human colonic epithelial cells (kind gift of G. Grassl, Hannover, Germany) were cultured in  
371 DMEM medium (high glucose, stable glutamine, sodium pyruvate) (Biowest, Nuaille, France)  
372 supplemented with 10% FCS and non-essential amino acids (Biowest). HeLa cells (ATCC CCL-2, LGC  
373 Standards, Wesel, Germany) were grown in DMEM (Biowest) supplemented with 10% FCS, sodium  
374 pyruvate and 2 mM GlutaMax (Thermo Fisher) and MDCK cells (subclone Pf, Department of  
375 Nephroplogy, FAU Erlangen-Nürnberg) were kept in MEM medium (Biowest) supplemented with 10%  
376 FCS, 2 mM Glutamax (Thermo Fisher) and non-essential amino acids (Biowest). To each medium  
377 100 U/mL penicillin and 100 µg/mL streptomycin (Biowest) were added. Cultures were incubated at  
378 37°C in a humidified 5% (v/v) CO<sub>2</sub> atmosphere. For invasion assays, HT29-MTX cells were seeded in  
379 24-well culture plates (#662160, Cellstar, Greiner Bio-One, Frickenhausen, Germany) at a density of  
380 4×10<sup>4</sup> cells per well 21 days prior infection. MDCK and HeLa cells were seeded in 96-well plates  
381 (#655180, Greiner Bio-One) at a density of 8×10<sup>4</sup> or 6×10<sup>3</sup> per well, respectively. MDCK cells were  
382 allowed to polarize for 10–11 days. The culture medium was changed every other day and medium  
383 without antibiotics was used for the last medium change.

384 Gentamicin protection assays were essentially carried out as described previously [7]. Briefly, bacterial  
385 overnight (O/N) cultures grown in LB supplemented with appropriate antibiotics were re-inoculated 1:31  
386 in fresh medium and grown aerobically for another 3.5 h. An inoculum corresponding to a multiplicity of  
387 infection (MOI) of 10 (HeLa) or 25 (MDCK, HT29-MTX) was prepared in MEM/DMEM and used to infect  
388 the cells for 25 min. After the cells had been washed thrice with PBS, MEM/DMEM containing 100 µg/mL  
389 gentamicin was applied to each well to kill remaining extracellular bacteria. After 1 h of incubation, the  
390 cell layers were washed again with PBS and then lysed for 10 min with PBS containing 1% Elugent  
391 (Merck Millipore, Darmstadt, Germany) and 0,0625% Antifoam B (Sigma-Aldrich, Schnelldorf, Germany)  
392 to liberate the intracellular bacteria. Serial dilutions of the inoculum and the lysates were plated on  
393 Mueller Hinton (MH) plates to determine the colony-forming units. Based on the inoculum the percentage  
394 of invasive bacteria was calculated and subsequently normalized to WT.

### 395 **Swarming assay**

396 Swarming of different *Salmonella* strains was assessed on semi-solid agar LB plates (LB with 5 g/L

397 NaCl, 0.5% agar) as described before (19). Briefly, a small amount (0.2  $\mu$ L) of bacterial O/N cultures  
398 was applied onto the center of LB soft agar plate and incubated for six hours at 37°C. The diameters of  
399 the swarm colonies were measured and the plates were photographed.

#### 400 **Capillary assay**

401 Capillary assays were essentially performed as described before (28) with the following modifications:  
402 An U-shaped dam created from a piece of modelling clay and parafilm was mounted onto a microscopy  
403 slide. The chamber thus created was sealed with a cover slip and filled with 500  $\mu$ L of a 3.5 h bacterial  
404 sub-culture. A 1  $\mu$ L capillary (BLAUBRAND intraEND, Brand, Wertheim, Germany) was heat-sealed at  
405 one end and then filled with a 100 mM MeAsp solution. The capillary prepared in this way was immersed  
406 in the chamber for 1 h at 37°C. The capillary was then rinsed, the sealed end broken off and the capillary  
407 contents was emptied using a pipetting aid (Brand). Serial dilutions were plated and CFUs determined

#### 408 **ELISA**

409 Antisera were raised in rabbits against the recombinant C-terminal moiety of SiiE (7). For detection of  
410 SiiE, culture supernatants were filter-sterilized (0.45  $\mu$ m syringe filters, Corning Life Sciences,  
411 Amsterdam, Netherlands), and aliquots of 50  $\mu$ L were directly applied to 96-well Nunc MultiSorp  
412 microtiter plates (#467340 Thermo Fisher) overnight at 4°C in a humid chamber. The plates were  
413 washed three times with 200  $\mu$ L/well of PBS supplemented with 0.05% Tween20 (PBS-Tween), and the  
414 rabbit anti-glutathione S-transferase(GST)-SiiE-C detection antibody diluted 1:1,000 in PBS plus 10%  
415 inactivated FCS (PBS-FCS) was applied for 2 h at RT. After five washes with PBS-Tween, 100  $\mu$ L of  
416 the anti-rabbit horseradish peroxidase-coupled secondary antibody diluted 1:2,500 in PBS-FCS was  
417 added to each well for 30 min at RT. The wells were washed again seven times with PBS-Tween, and  
418 50  $\mu$ L of enzyme-linked immunosorbent assay (ELISA) horseradish peroxidase substrate (#555214,  
419 Becton Dickinson, Heidelberg, Germany) was added. After incubation in the dark at RT for 8 to 15 min,  
420 the reaction was stopped by the addition of 25  $\mu$ L/well 0.5 M H<sub>2</sub>SO<sub>4</sub> and A<sub>450</sub> was measured using a  
421 M1000 plate reader (Tecan, Männedorf, Switzerland).

#### 422 **Dot Blot**

423 Bacterial strains were diluted 1:31 in LB from O/N cultures and grown at 37°C for 3.5 h. Aliquots of 1 mL  
424 of bacterial culture were collected, cells pelleted and re-suspended in 1 mL of sterile LB. After an  
425 additional washing step with sterile LB, bacterial suspensions were adjusted to OD<sub>600</sub>=1 in 500  $\mu$ L of 3%



426 PFA in PBS. After fixation of bacterial cells for 15 min at RT, cells were pelleted (10,000 × g, 5 min., RT)  
427 and re-suspended in 500 µL PBS. Five microliters of bacterial suspensions were spotted on  
428 nitrocellulose membrane pieces, set in a black 24-well plate, which have been pre-wetted with PBS and  
429 dried again before adding bacteria. After drying of the spots, membranes were blocked with 5% dry milk  
430 powder and 3% BSA in PBS/T (PBS + 0.1% Tween20) for at least 30 min. For detection of SiiE on the  
431 bacterial surface, antiserum against the C-terminal moiety of SiiE was diluted 1:5,000 in blocking  
432 solution and applied to the membrane. LPS was detected using antiserum against Salmonella O-antigen  
433 (Becton Dickinson) at the same dilution. After incubation O/N at 4°C, membranes were washed thrice  
434 with PBS/T and HRP-linked secondary antibody was added in a 1:50,000 dilution in PBS/T. After three  
435 additional washing steps with PBS/T, membranes were rinsed in PBS, substrate for HRP was applied  
436 and signals were quantified using a Tecan M1000 plate reader in luminescence mode.

#### 437 **SIMPLE Assay**

438 A screen for ligand expression using immunomagnetic particles (SIMPLE) assay was carried out as  
439 described by Nuccio *et al.* (37) with the following modifications. *Salmonella* strains were sub-cultured  
440 1:31 from O/N for 3.5 h at 37°C and adjusted to OD<sub>600</sub>=2 in fresh PB buffer (=TN buffer (0.1 M Tris-HCl  
441 pH7.5, 0.15 M NaCl) plus 1% casein). Strains carried either plasmid pWSK29 or derivatives to exhibit  
442 carbenicillin resistance or plasmid pWSK129 for a kanamycin resistance. The strains were mixed at a  
443 ratio of 1:1 and bacteria were then pre-incubated with α-SiiE antibody or pre-immune serum in 650 µL  
444 PB-buffer for 1 h at RT with head-over-head rotation. Then, 100 µL of washed magnetic beads (BioMag  
445 Protein A, Qiagen, Hilden, Germany) resuspended in 100 µL TN-buffer were added to each sample  
446 (total volume of 750 µL) and incubated for two additional hours. After three washing steps with 750 µL  
447 TN buffer, beads were suspended in 1 mL PBS. Serial dilutions of all probes were plated in parallel on  
448 MH plates containing carbenicillin or kanamycin, CFU were determined and enrichment based on the  
449 competitive index and normalization to pre-immune serum controls was calculated.

#### 450 **Acknowledgements**

451 We thank Guntram Grassl (Hannover, Germany) for providing cell line HT29-MTX. This work was funded  
452 by grants of the German research foundation ([www.DFG.de](http://www.DFG.de)) to Y.A.M. (MU 1477 9/2), M.H. (HE 1964  
453 13/2) and R.G.G. (GE 2533 2/2).

454 **References**

- 455 1. I. Behlau, S. I. Miller, A PhoP-repressed gene promotes *Salmonella typhimurium* invasion of  
456 epithelial cells. *J Bacteriol* **175**, 4475-4484 (1993).
- 457 2. B. Stecher *et al.*, *Salmonella enterica* serovar Typhimurium exploits inflammation to compete  
458 with the intestinal microbiota. *PLoS Biol* **5**, 2177-2189 (2007).
- 459 3. M. Lara-Tejero, J. E. Galán, *Salmonella enterica* serovar typhimurium pathogenicity island 1-  
460 encoded type III secretion system translocases mediate intimate attachment to nonphagocytic  
461 cells. *Infect Immun* **77**, 2635-2642 (2009).
- 462 4. B. Misselwitz *et al.*, *Salmonella enterica* serovar Typhimurium binds to HeLa cells via Fim-  
463 mediated reversible adhesion and irreversible type three secretion system 1-mediated docking.  
464 *Infect Immun* **79**, 330-341 (2011).
- 465 5. R. G. Gerlach *et al.*, Cooperation of *Salmonella* pathogenicity islands 1 and 4 is required to  
466 breach epithelial barriers. *Cell Microbiol* **10**, 2364-2376 (2008).
- 467 6. R. G. Gerlach, D. Jäckel, N. Geymeier, M. Hensel, *Salmonella* pathogenicity island 4-mediated  
468 adhesion is coregulated with invasion genes in *Salmonella enterica*. *Infect Immun* **75**, 4697-  
469 4709 (2007).
- 470 7. R. G. Gerlach *et al.*, *Salmonella* Pathogenicity Island 4 encodes a giant non-fimbrial adhesin  
471 and the cognate type 1 secretion system. *Cell Microbiol* **9**, 1834-1850 (2007).
- 472 8. X. Li *et al.*, MUC1 is a receptor for the *Salmonella* SiiE adhesin that enables apical invasion into  
473 enterocytes. *PLoS Pathog* **15**, e1007566 (2019).
- 474 9. C. Wagner, B. Barlag, R. G. Gerlach, J. Deiwick, M. Hensel, The *Salmonella enterica* giant  
475 adhesin SiiE binds to polarized epithelial cells in a lectin-like manner. *Cell Microbiol* **16**, 962-  
476 975 (2014).
- 477 10. M. H. Griessl *et al.*, Structural insight into the giant Ca<sup>2+</sup>-binding adhesin SiiE: implications for  
478 the adhesion of *Salmonella enterica* to polarized epithelial cells. *Structure* **21**, 741-752 (2013).
- 479 11. B. Peters *et al.*, Structural and functional dissection reveals distinct roles of Ca<sup>2+</sup>-binding sites  
480 in the giant adhesin SiiE of *Salmonella enterica*. *PLoS Pathog* **13**, e1006418 (2017).
- 481 12. S. Thomas, I. B. Holland, L. Schmitt, The Type 1 secretion pathway - The hemolysin system  
482 and beyond. *Biochimica et biophysica acta* 10.1016/j.bbamcr.2013.09.017 (2013).
- 483 13. C. Männe *et al.*, *Salmonella* SiiE prevents an efficient humoral immune memory by interfering  
484 with IgG<sup>+</sup> plasma cell persistence in the bone marrow. *Proc Natl Acad Sci U S A* **116**, 7425-  
485 7430 (2019).
- 486 14. C. Wagner *et al.*, Functional dissection of SiiE, a giant non-fimbrial adhesin of *Salmonella*  
487 *enterica*. *Cell Microbiol* **13**, 1286-1301 (2011).
- 488 15. T. Wille *et al.*, SiiA and SiiB are novel type I secretion system subunits controlling SPI4-mediated  
489 adhesion of *Salmonella enterica*. *Cell Microbiol* **16**, 161-178 (2014).
- 490 16. P. Kirchweger *et al.*, Structural and functional characterization of SiiA, an auxiliary protein from  
491 the SPI4-encoded type 1 secretion system from *Salmonella enterica*. *Mol Microbiol* **112**, 1403-  
492 1422 (2019).
- 493 17. Y. Blat, M. Eisenbach, Tar-dependent and -independent pattern formation by *Salmonella*  
494 *typhimurium*. *J Bacteriol* **177**, 1683-1691 (1995).
- 495 18. J. S. Parkinson, G. L. Hazelbauer, J. J. Falke, Signaling and sensory adaptation in *Escherichia*  
496 *coli* chemoreceptors: 2015 update. *Trends Microbiol* **23**, 257-266 (2015).
- 497 19. S. Hoffmann, C. Schmidt, S. Walter, J. K. Bender, R. G. Gerlach, Scarless deletion of up to  
498 seven methyl-accepting chemotaxis genes with an optimized method highlights key function of  
499 CheM in *Salmonella* Typhimurium. *PLoS One* **12**, e0172630 (2017).
- 500 20. B. D. Jones, C. A. Lee, S. Falkow, Invasion by *Salmonella typhimurium* is affected by the  
501 direction of flagellar rotation. *Infect Immun* **60**, 2475-2480 (1992).
- 502 21. A. F. Kolodziej, T. Tan, D. E. Koshland, Jr., Producing positive, negative, and no cooperativity  
503 by mutations at a single residue located at the subunit interface in the aspartate receptor of  
504 *Salmonella typhimurium*. *Biochemistry* **35**, 14782-14792 (1996).
- 505 22. T. Mizuno, N. Mutoh, S. M. Panasenko, Y. Imae, Acquisition of maltose chemotaxis in  
506 *Salmonella typhimurium* by the introduction of the *Escherichia coli* chemosensory transducer  
507 gene. *J Bacteriol* **165**, 890-895 (1986).
- 508 23. G. Karimova, J. Pidoux, A. Ullmann, D. Ladant, A bacterial two-hybrid system based on a  
509 reconstituted signal transduction pathway. *Proc Natl Acad Sci U S A* **95**, 5752-5756 (1998).
- 510 24. G. Karimova, A. Ullmann, D. Ladant, A bacterial two-hybrid system that exploits a cAMP  
511 signaling cascade in *Escherichia coli*. *Methods Enzymol* **328**, 59-73 (2000).
- 512 25. B. Misselwitz *et al.*, Near surface swimming of *Salmonella* Typhimurium explains target-site

- 513 selection and cooperative invasion. *PLoS Pathog* **8**, e1002810 (2012).
- 514 26. F. J. Van Asten, H. G. Hendriks, J. F. Koninkx, B. A. Van der Zeijst, W. Gaastra, Inactivation of  
515 the flagellin gene of *Salmonella enterica* serotype Enteritidis strongly reduces invasion into  
516 differentiated Caco-2 cells. *FEMS microbiology letters* **185**, 175-179 (2000).
- 517 27. T. Khoramian-Falsafi, S. Harayama, K. Kutsukake, J. C. Pechere, Effect of motility and  
518 chemotaxis on the invasion of *Salmonella typhimurium* into HeLa cells. *Microb Pathog* **9**, 47-53  
519 (1990).
- 520 28. J. Adler, A method for measuring chemotaxis and use of the method to determine optimum  
521 conditions for chemotaxis by *Escherichia coli*. *J Gen Microbiol* **74**, 77-91 (1973).
- 522 29. R. Mesibov, J. Adler, Chemotaxis toward amino acids in *Escherichia coli*. *J Bacteriol* **112**, 315-  
523 326 (1972).
- 524 30. S. Neumann, C. H. Hansen, N. S. Wingreen, V. Sourjik, Differences in signalling by directly and  
525 indirectly binding ligands in bacterial chemotaxis. *EMBO J* **29**, 3484-3495 (2010).
- 526 31. M. L. Hedblom, J. Adler, Genetic and biochemical properties of *Escherichia coli* mutants with  
527 defects in serine chemotaxis. *J Bacteriol* **144**, 1048-1060 (1980).
- 528 32. T. Lesuffleur, A. Barbat, E. Dussaulx, A. Zweibaum, Growth adaptation to methotrexate of HT-  
529 29 human colon carcinoma cells is associated with their ability to differentiate into columnar  
530 absorptive and mucus-secreting cells. *Cancer Res* **50**, 6334-6343 (1990).
- 531 33. F. Rivera-Chávez *et al.*, Energy Taxis toward Host-Derived Nitrate Supports a *Salmonella*  
532 Pathogenicity Island 1-Independent Mechanism of Invasion. *mBio* **7** (2016).
- 533 34. F. Rivera-Chávez *et al.*, *Salmonella* uses energy taxis to benefit from intestinal inflammation.  
534 *PLoS Pathog* **9**, e1003267 (2013).
- 535 35. B. Stecher *et al.*, Flagella and chemotaxis are required for efficient induction of *Salmonella*  
536 *enterica* serovar Typhimurium colitis in streptomycin-pretreated mice. *Infect Immun* **72**, 4138-  
537 4150 (2004).
- 538 36. M. A. Matilla, T. Krell, The effect of bacterial chemotaxis on host infection and pathogenicity.  
539 *FEMS Microbiol Rev* **42** (2018).
- 540 37. S. P. Nuccio *et al.*, SIMPLE approach for isolating mutants expressing fimbriae. *Appl Environ*  
541 *Microbiol* **73**, 4455-4462 (2007).
- 542 38. K. G. Cooper *et al.*, Regulatory protein HilD stimulates *Salmonella* Typhimurium invasiveness  
543 by promoting smooth swimming via the methyl-accepting chemotaxis protein McpC. *Nat*  
544 *Commun* **12**, 348 (2021).
- 545 39. C. García-Fontana *et al.*, The involvement of McpB chemoreceptor from *Pseudomonas*  
546 *aeruginosa* PAO1 in virulence. *Sci Rep* **9**, 13166 (2019).
- 547 40. H. P. McLaughlin, D. L. Caly, Y. McCarthy, R. P. Ryan, J. M. Dow, An orphan chemotaxis sensor  
548 regulates virulence and antibiotic tolerance in the human pathogen *Pseudomonas aeruginosa*.  
549 *PLoS One* **7**, e42205 (2012).
- 550 41. Y. Choi *et al.*, Plasmid-encoded MCP is involved in virulence, motility, and biofilm formation of  
551 *Cronobacter sakazakii* ATCC 29544. *Infect Immun* **83**, 197-204 (2015).
- 552 42. A. P. Chaparro, S. K. Ali, K. E. Klose, The ToxT-dependent methyl-accepting chemoreceptors  
553 AcfB and Tcpl contribute to *Vibrio cholerae* intestinal colonization. *FEMS microbiology letters*  
554 **302**, 99-105 (2010).
- 555 43. M. Guo, Z. Huang, J. Yang, Is there any crosstalk between the chemotaxis and virulence  
556 induction signaling in *Agrobacterium tumefaciens*? *Biotechnol Adv* **35**, 505-511 (2017).
- 557 44. R. Kumar Verma, B. Samal, S. Chatterjee, *Xanthomonas oryzae* pv. *oryzae* chemotaxis  
558 components and chemoreceptor Mcp2 are involved in the sensing of constituents of xylem sap  
559 and contribute to the regulation of virulence-associated functions and entry into rice. *Mol Plant*  
560 *Pathol* **19**, 2397-2415 (2018).
- 561 45. S. Kojima *et al.*, The Helix Rearrangement in the Periplasmic Domain of the Flagellar Stator B  
562 Subunit Activates Peptidoglycan Binding and Ion Influx. *Structure* **26**, 590-598 e595 (2018).
- 563 46. K. Postle, R. A. Larsen, TonB-dependent energy transduction between outer and cytoplasmic  
564 membranes. *Biomaterials* **20**, 453-465 (2007).
- 565 47. P. Germon, M. C. Ray, A. Vianney, J. C. Lazzaroni, Energy-dependent conformational change  
566 in the TolA protein of *Escherichia coli* involves its N-terminal domain, TolQ, and TolR. *J Bacteriol*  
567 **183**, 4110-4114 (2001).
- 568 48. A. Jahan-Mihan, B. L. Luhovyy, D. El Khoury, G. H. Anderson, Dietary proteins as determinants  
569 of metabolic and physiologic functions of the gastrointestinal tract. *Nutrients* **3**, 574-603 (2011).
- 570 49. N. van der Wielen, P. J. Moughan, M. Mensink, Amino Acid Absorption in the Large Intestine of  
571 Humans and Porcine Models. *J Nutr* **147**, 1493-1498 (2017).
- 572 50. H. G. Windmueller, A. E. Spaeth, Respiratory fuels and nitrogen metabolism in vivo in small  
573 intestine of fed rats. Quantitative importance of glutamine, glutamate, and aspartate. *J Biol*

- 574 *Chem* **255**, 107-112 (1980).
- 575 51. Z. L. Dai, G. Wu, W. Y. Zhu, Amino acid metabolism in intestinal bacteria: links between gut  
576 ecology and host health. *Front Biosci (Landmark Ed)* **16**, 1768-1786 (2011).
- 577 52. S. P. Claus *et al.*, Systemic multicompartamental effects of the gut microbiome on mouse  
578 metabolic phenotypes. *Mol Syst Biol* **4**, 219 (2008).
- 579 53. B. D. Nguyen *et al.*, Import of Aspartate and Malate by DcuABC Drives H<sub>2</sub>/Fumarate Respiration  
580 to Promote Initial *Salmonella* Gut-Lumen Colonization in Mice. *Cell Host Microbe* **27**, 922-936  
581 e926 (2020).
- 582 54. R Core Team (2021) R: A language and environment for statistical computing. (R Foundation  
583 for Statistical Computing, Vienna, Austria).
- 584 55. M. Fischer, S. Zilkenat, R. G. Gerlach, S. Wagner, B. Y. Renard, Pre- and post-processing  
585 workflow for affinity purification mass spectrometry data. *J Proteome Res* **13**, 2239-2249 (2014).

586 **Figures and Tables**

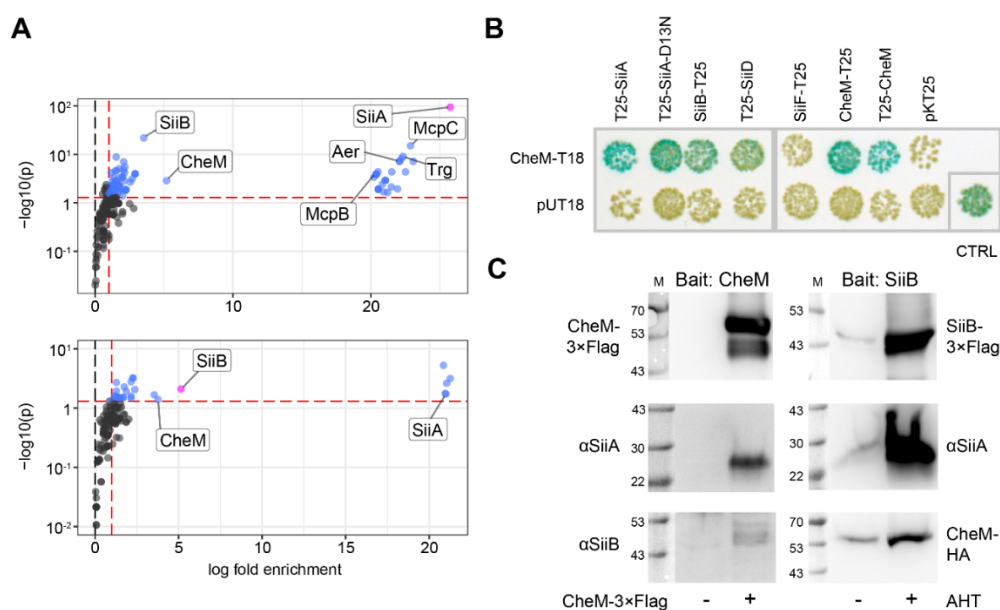

587  
 588 **Figure 1. SPI-4 components interact with CheM.** (A) Analysis of affinity purification mass  
 589 spectrometry data using SiiA-3×Flag (upper panel) or SiiB-3×Flag (lower panel) as bait proteins  
 590 (magenta dots). Red dashed lines show limits of significant enrichment (>2-fold,  $p < 0.05$ ). Interacting  
 591 proteins within these limits are depicted in blue with SPI-4 components and MCPs labeled. Summarized  
 592 data of three independent experiments are shown. (B) Bacterial two hybrid assays evaluating the  
 593 interaction between the T18 fragment of CyaA alone (pUT18, negative control) or fused to the C-  
 594 terminus of CheM (CheM-T18) with the CyaA T25 fragment alone (pKT25, negative control) or T25  
 595 fused to the indicated SPI-4 proteins or CheM. Functional reconstitution of CyaA activity through protein-  
 596 protein interactions resulted in blue color of the *E. coli* BTH101 reporter strain colonies. A positive control  
 597 (CTRL) was included based on the interaction of GCN4 leucine zippers. (C) Co-immunoprecipitation  
 598 using CheM-3×Flag (left panels) or SiiB-3×Flag (right panels) as bait proteins. A plasmid-encoded copy  
 599 of *cheM* was expressed from its natural promoter either without (left lane) or with (right lane) 3×Flag  
 600 epitope tag. SiiA and SiiB were detected using polyclonal antibodies. Expression of SiiAB-3×Flag from  
 601 plasmid pWRG905 was induced with addition of 50 ng/mL anhydrotetracycline (AHT) or left uninduced  
 602 (left lane). While SiiA was detected with a specific antiserum, a plasmid encoding for CheM-HA was co-  
 603 transformed allowing CheM detection via HA tag. M = molecular weight marker with protein sizes in kDa.

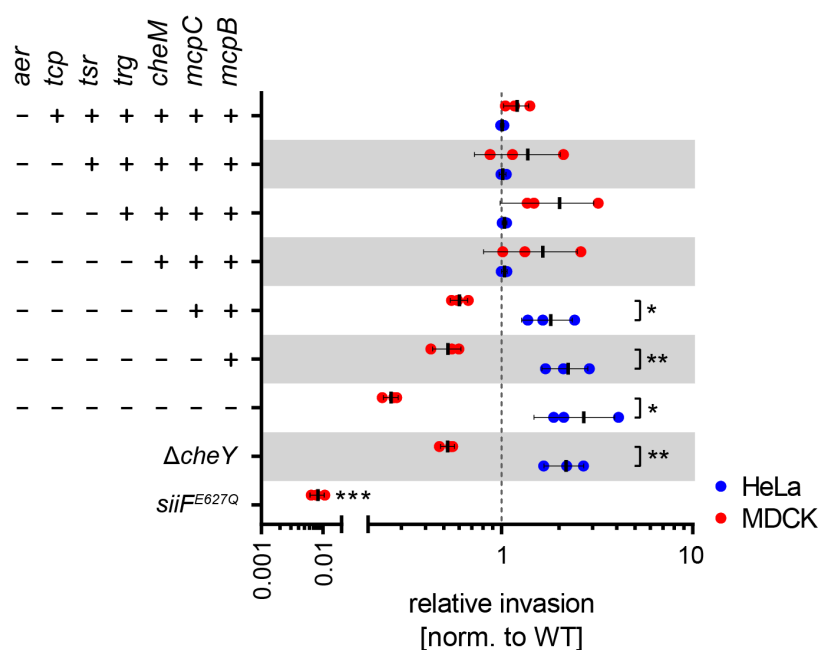

604  
 605 **Fig 2. Role of MCPs for bacterial invasion.** Relative invasion rates as normalized to *S. Typhimurium*  
 606 (*STM*) wild-type (WT, dotted line) after one hour of infection of indicated sequential MCP deletion strains  
 607 into HeLa (blue) and MDCK (red) cells are shown. The non-chemotactic  $\Delta cheY$  strain and a *siiF* E627Q  
 608 mutant with a non-functional SPI-4 were included as controls. Data of three independent experiments  
 609 done in triplicates are depicted. Statistical significance was calculated using unpaired, two-tailed *t* test  
 610 between groups or a one sample *t* test against the hypothetical value 1 (*siiF* E627Q) and were defined  
 611 as \* for  $p < 0.05$  and \*\* for  $p < 0.01$  and \*\*\* for  $p < 0.001$ .

612

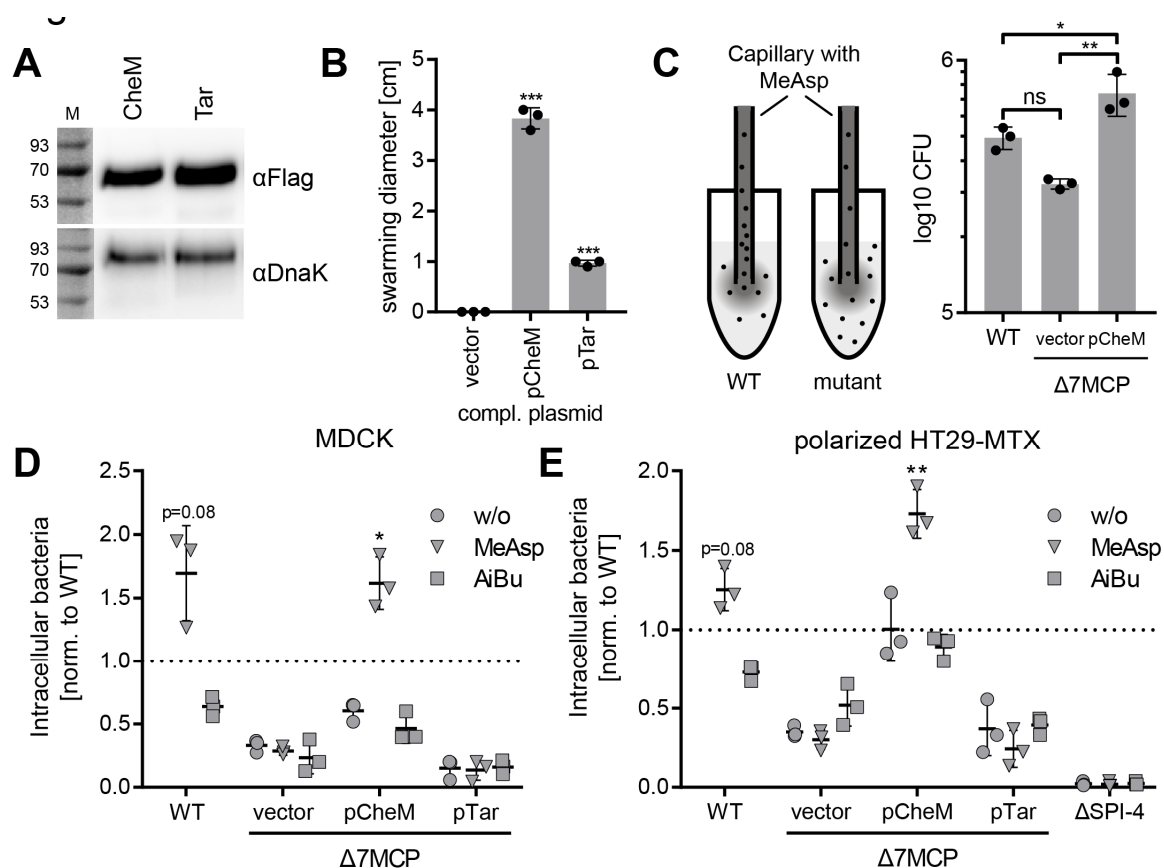

613  
 614 **Fig 3. CheM complementation and impact of CheM signaling on invasion of polarized cells.** (A)  
 615 Expression of either CheM-3×Flag or Tar-3×Flag from the CheM promoter in a *S. Typhimurium* (STM)  
 616 strain lacking all 7 MCP genes ( $\Delta$ 7 MCP) was detected with a Flag-specific monoclonal antibody. Equal  
 617 sample loading was demonstrated by DnaK. M = molecular weight marker with protein sizes in kDa. (B)  
 618 The  $\Delta$ 7 MCP strain transformed with the empty vector pWSK29 (vector) or vectors encoding for CheM  
 619 (pCheM) or Tar (pTar) were subjected to swarming assays on soft agar plates. Mean swarming  
 620 diameters  $\pm$  SD after 8.5 h of growth are depicted for three independent experiments. Statistical  
 621 significance was calculated using a one sample *t* test against the hypothetical value 0 (vector control)  
 622 and were defined as \*\*\* for  $p < 0.001$ . (C) Principle of capillary assay. Wild-type (WT) bacteria with  
 623 functional CheM-dependent chemotaxis swim towards a gradient of  $\alpha$ -methyl-D, L-aspartate (MeAsp)  
 624 generated by an attractant-filled capillary. No enrichment within the capillary is observed for mutants  
 625 with defects in CheM-signaling (left panel). Mean amount  $\pm$  SD of STM WT or the  $\Delta$ 7 MCP with empty  
 626 vector (vector) or pCheM within the capillary after 1 h. of chemotactic movement from three independent  
 627 experiments are shown (right panel). One way ANOVA with Tukey's multiple comparison test was  
 628 calculated and was defined as \* for adj.  $p < 0.05$  and \*\* for adj.  $p < 0.01$ . (D and E) Relative invasion  
 629 rates as normalized to STM WT (black dotted line) after one hour of infection of the indicated strains

630 into polarized MDCK (D) or HT29-MTX (E) cells are shown. The strains were either grown without (w/o)  
631 attractant or with addition of 10 mM MeAsp or 10 mM AiBu. A SPI-4 deficient strain ( $\Delta$ SPI-4) was  
632 included as control for HT29-MTX. Mean  $\pm$  SD from three independent experiments are depicted.  
633 Statistical significance of strains with increased invasiveness was calculated using a one sample *t* test  
634 against the hypothetical value 1 and were defined as \* for  $p < 0.05$  and \*\* for  $p < 0.01$ .



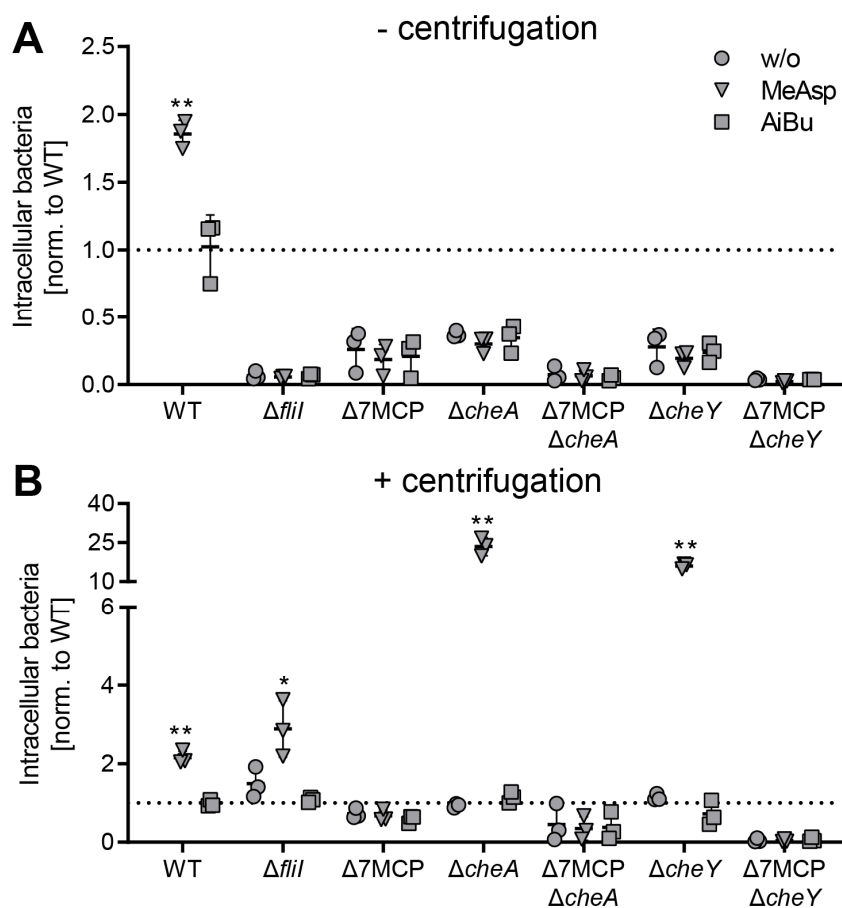

635

636 **Fig 4. Impact of motility and chemotaxis components on *Salmonella* invasion of polarized MDCK.**

637 *S. Typhimurium* (STM) wild-type (WT), the non-motile  $\Delta flil$  mutant, the  $\Delta 7$  MCP deletion strain, the  
 638 chemotaxis mutants  $\Delta cheA$  and  $\Delta cheY$  or strains lacking besides *cheA* or *cheY* additionally all 7 MCPs  
 639 were grown without attractant (w/o), in the presence of 10 mM MeAsp or 10 mM AiBu. Inoculi were  
 640 added to the MDCK cells (A) or bacteria were brought in close host cell contact through centrifugation  
 641 to compensate for lack of chemotaxis or motility (B). Intracellular bacteria were quantified after one hour  
 642 of infection and relative invasion rates were calculated based on STM WT without attractant. Data of  
 643 three independent experiments done in triplicates are depicted. Statistical significance of strains with  
 644 increased invasiveness was calculated using a one sample *t* test against the hypothetical value 1.0 and  
 645 was defined as \* for  $p < 0.05$  and \*\* for  $p < 0.01$ .

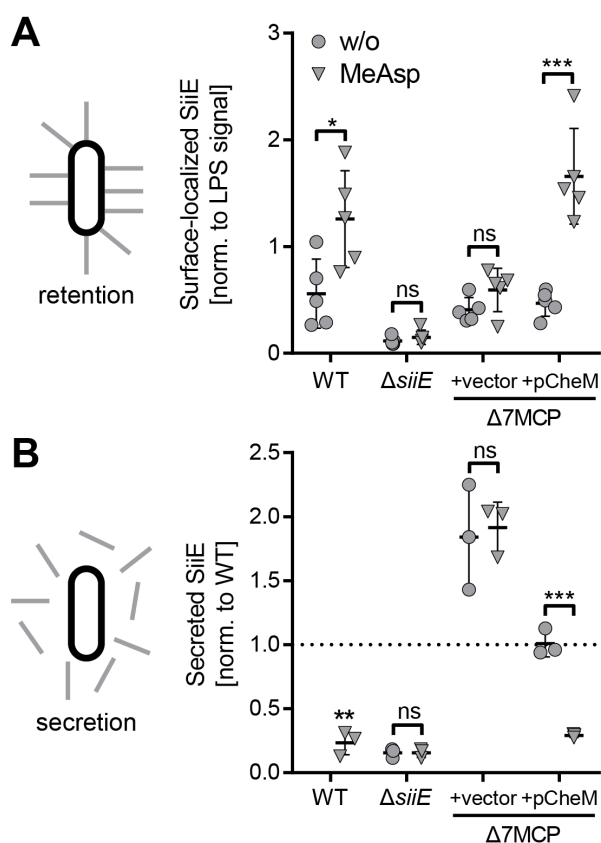

646

647 **Fig 5. CheM-specific attractant binding promotes SiiE surface localization.** (A) Dot-blot were used  
 648 to quantify surface-localized SiiE and LPS (used for normalization) of *S. Typhimurium* (STM) wild-type  
 649 (WT), a  $\Delta$ siiE mutant or the  $\Delta$ 7 MCP deletion strain, transformed with the empty vector (vector) or  
 650 pCheM. Bacteria were either grown without (w/o) or in the presence of 10 mM MeAsp. Mean data  $\pm$  SD  
 651 of five independent experiments are shown. (B) Secreted SiiE was quantified using an ELISA after 3.5  
 652 h of growth of the strains and under the conditions as described in (A). Mean data  $\pm$  SD of three  
 653 independent experiments done in triplicates are shown. Statistical significance was calculated using  
 654 unpaired, two-tailed *t* test between groups or a one sample *t* test against the hypothetical value 1.0 (WT  
 655 in (B)) and was defined as ns = not significant, \* for  $p < 0.05$ , \*\* for  $p < 0.01$  and \*\*\* for  $p < 0.001$ .

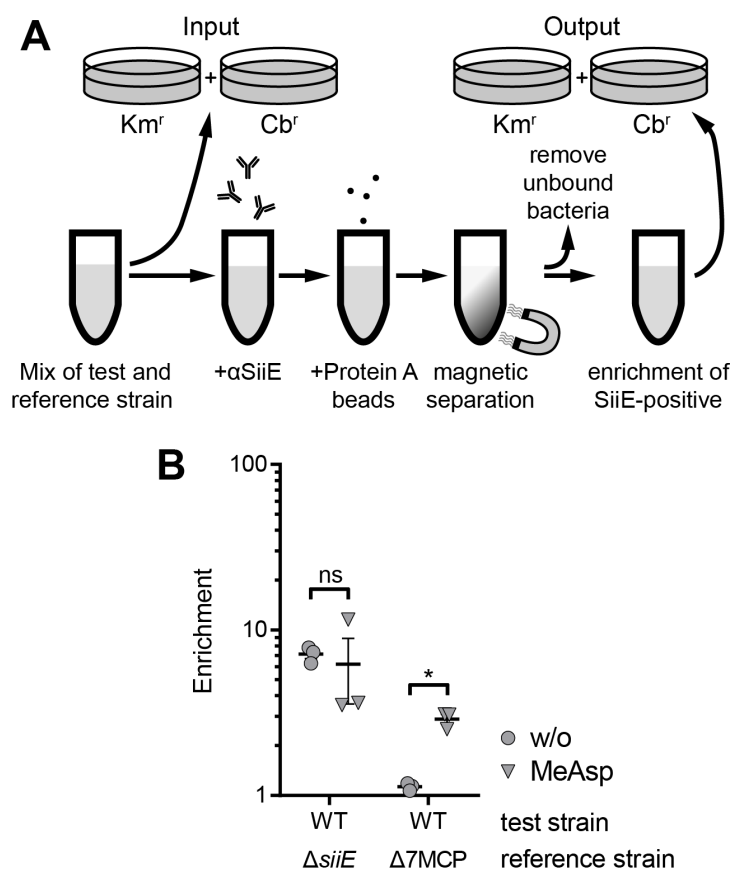

656

657 **Fig 6. Increase of adhesion-competent SiiE in the presence of MeAsp.** (A) Principle of a modified  
658 screening with immunomagnetic particles for ligand expression (SIMPLE) assay. (B) Enrichment of the  
659 test strains compared to the reference strains as indicated without (w/o) or in the presence of 10 mM  
660 MeAsp was determined using the SIMPLE assay as shown in (A). Data of three independent  
661 experiments done in triplicates are shown. Statistical significance was calculated using unpaired, two-  
662 tailed *t* test between groups as indicated and was defined as ns = not significant and \* for  $p < 0.05$ .

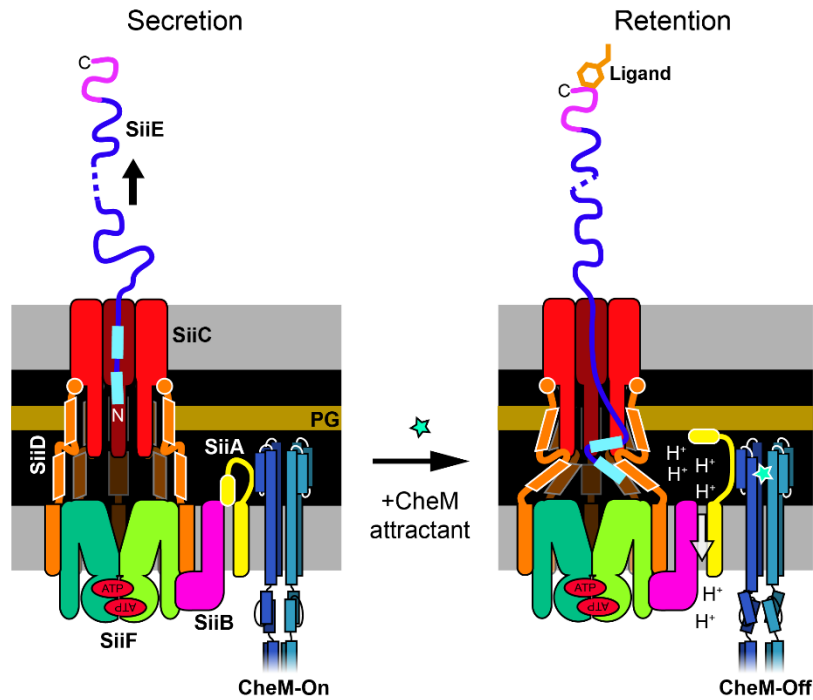

663

664 **Figure 7. Proposed model how CheM could control SiiE-mediated adhesion.** In the absence of  
665 attractant, CheM is in the kinase “on” state and the SiiAB proton channel is inactive, presumably due to  
666 the periplasmic peptidoglycan (PG) binding domain of SiiA functioning as a plug (left panel). Upon  
667 addition of CheM attractant, structural changes in the ligand binding domain of CheM induce  
668 displacement of the periplasmic SiiA portion and subsequent association with PG. Proton flux through  
669 SiiAB could energize structural changes in the T1SS thus retaining the N-terminal domain of SiiE within  
670 the channel (right panel).
